# Supplementary material
Source: PubMed Central journal article supplement (PMC7690363)
Supplement: noaa121_suppl_supplementary_figure_5.pdf [file noaa121_suppl_supplementary_figure_5.pdf]

FGFR3

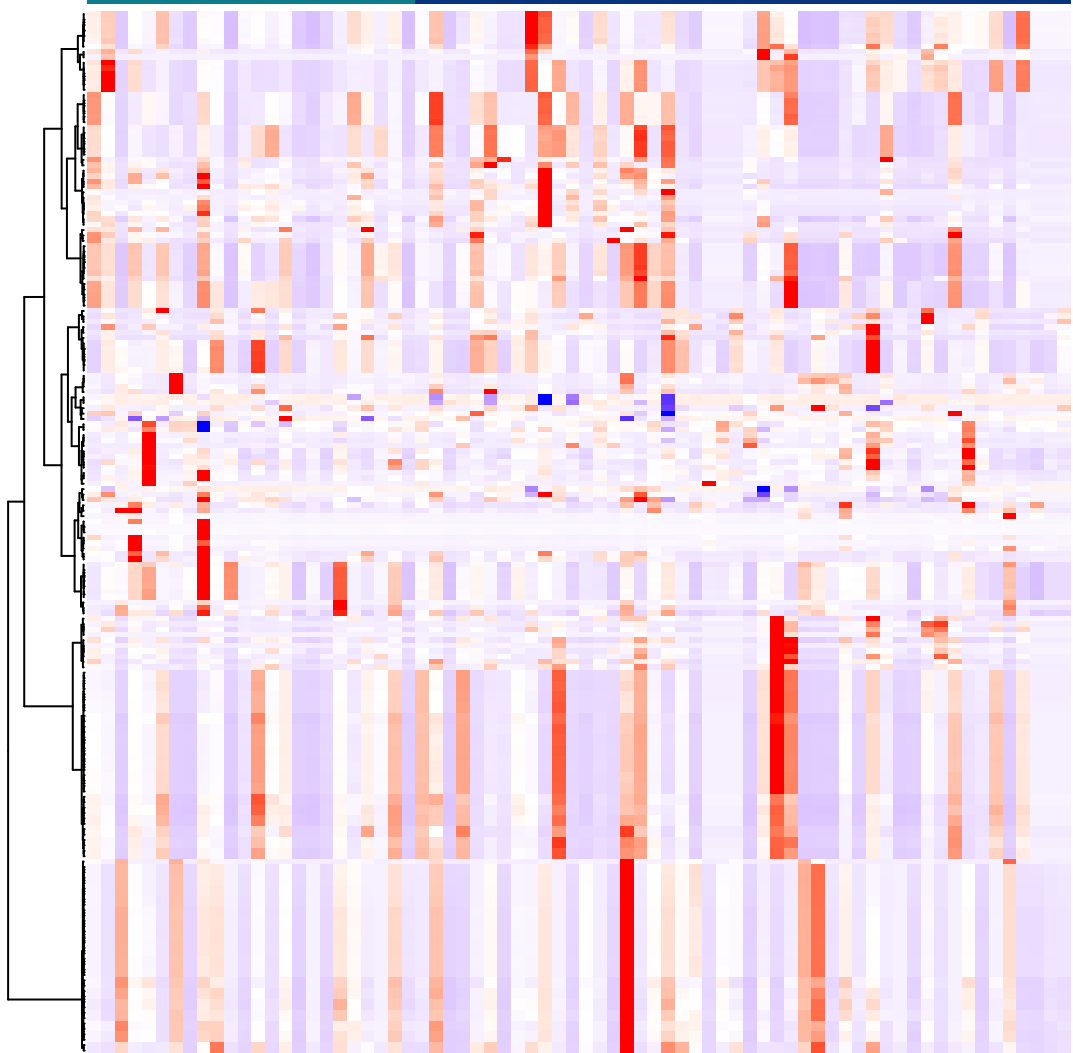

**Radiomics z-score**

4  
2  
0  
-2  
-4

**FGFR3**

Fusion  
No fusion

**base mean**

1e-16  
5e-17  
0  
-5e-17  
-1e-16

**sequence**

flair  
gado

**type of feature**

wavelet  
logarithm  
squareroot  
original  
square  
exponential  
log

**type of wavelet**

LLL  
LLH  
LHH  
HLH  
HHL  
HHH  
LHL  
HLL

base mean

sequence

type of feature

type of wavelet
