# Supplementary material
Source: PubMed Central journal article supplement (PMC7690363)

# Weight impact on OS using radiomics features in the overall population

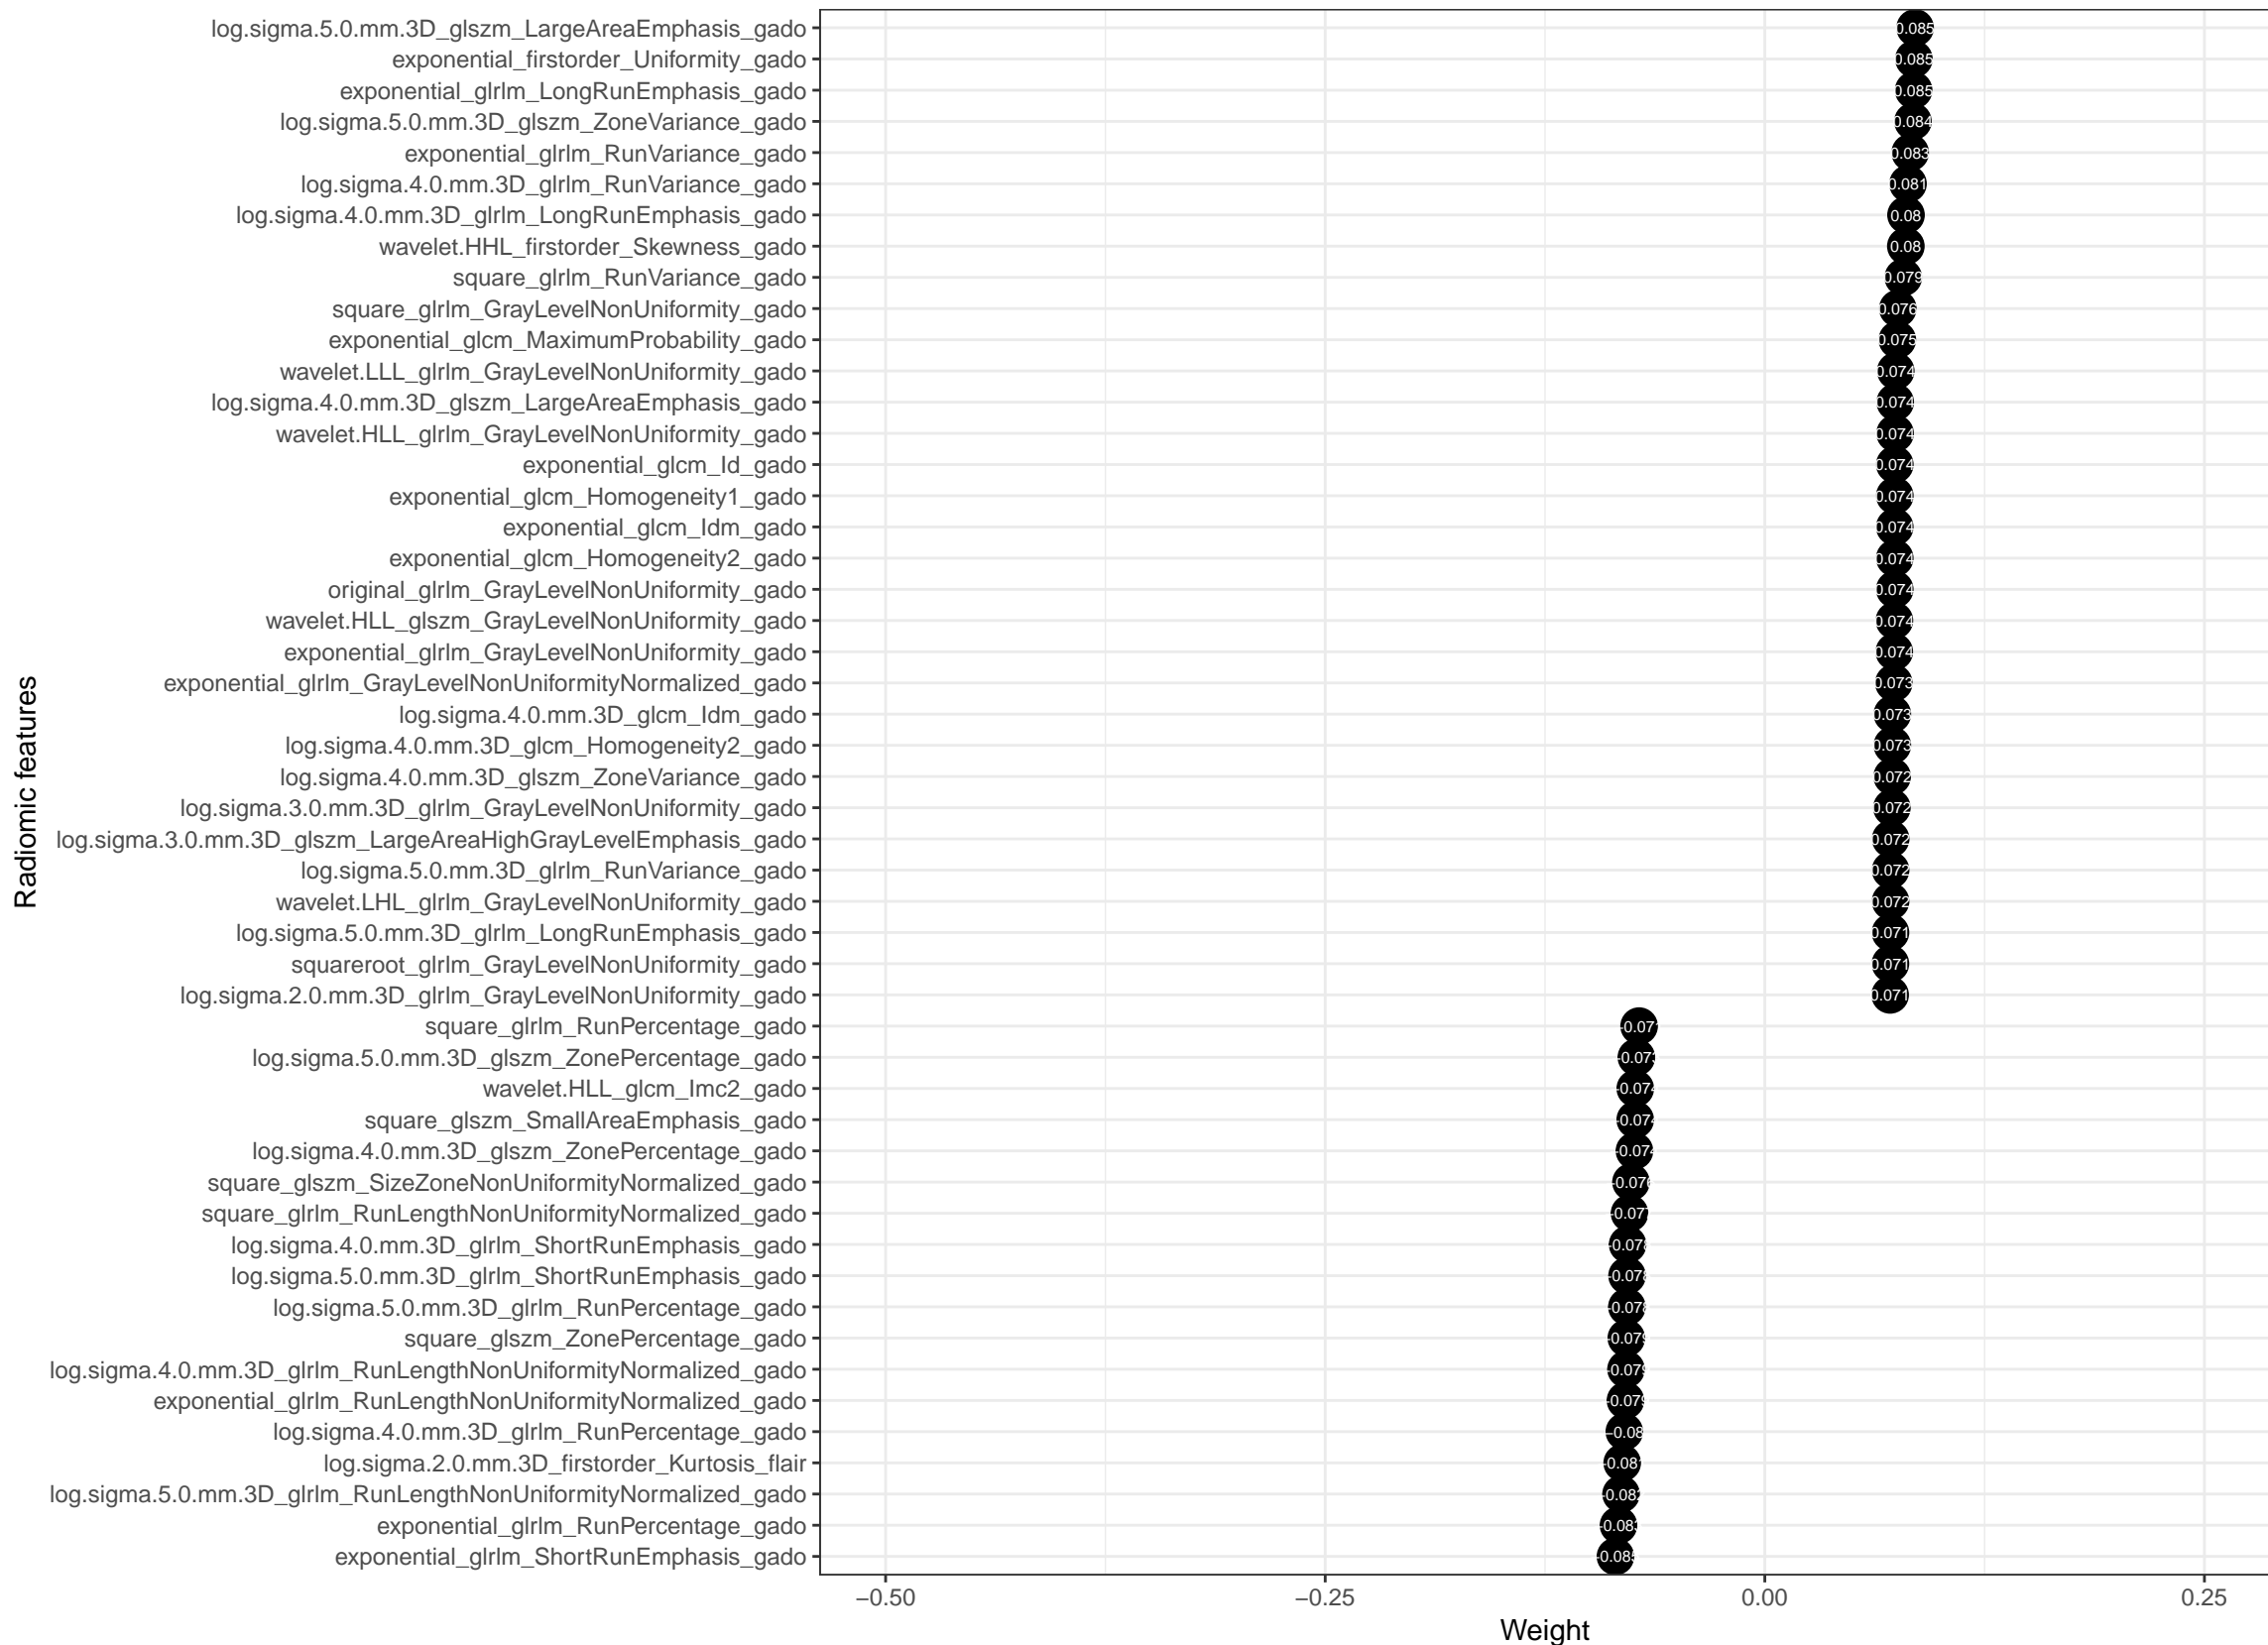

Supplement: noaa121_suppl_supplementary_figure_6.pdf [file noaa121_suppl_supplementary_figure_6.pdf]
